# Supplementary material for: MiR-122 Promotes the Development of Colon Cancer by Targeting ALDOA In Vitro
Source: PubMed Central journal article supplement — Technol Cancer Res Treat. 2019 Sep 29;18:1533033819871300. doi: 10.1177/1533033819871300 (PMC6767722; doi:10.1177/1533033819871300), 2019-09-29
Supplement: Supplementary_Table_S1.pdf [file Supplementary_Table_S1.pdf]

Supplementary Table S1: Primer sequences

| Name                   | Sequence (5'-3')                                       |
|------------------------|--------------------------------------------------------|
| ALDOA-qPCR-PF          | CACCTGGCAAGGGCATCC                                     |
| ALDOA-qPCR-PR          | CCGCCTTCTGGTAGAGTGTCTC                                 |
| ALDOA-3'UTR-PF         | GGGTTTAAACACGCCTATTAAGCGGAGGT                          |
| ALDOA-3'UTR-PR         | CCCTCGAGCGGAAAGGGTGATGGACT                             |
| ALDOA-3'UTR-Mut-PF     | GCCCCAACTGAGCAGGCCCTG                                  |
| ALDOA-3'UTR-Mut-PR     | CAGGGCCTGCTCAGTTGGGGGC                                 |
| $\beta$ -actin-qPCR-PF | GGCACCACACCTTCTACAATG                                  |
| $\beta$ -actin-qPCR-PR | GGGGTGTTGAAGGTCTCAAAC                                  |
| miR-122-Loop           | GTCGTATCCAGTGCAGGGTCCGAGGTATTCGCAC<br>TGGATACGACCAAACA |
| miR-122-PF             | AACCGGTGGAGTGTGACAAT                                   |
| miR-122-PR             | GTCGTATCCAGTGCAGGGT                                    |
| miR-10-Loop            | GTCGTATCCAGTGCAGGGTCCGAGGTATTCGCA<br>CTGGATACGACCACAAA |
| miR-10-PF              | AACACGCTACCCTGTAGAACC                                  |
| miR-10-PR              | GTCGTATCCAGTGCAGGGT                                    |
| miR-199-Loop           | GTCGTATCCAGTGCAGGGTCCGAGGTATTCGC<br>ACTGGATACGACCCAATG |
| miR-199-PF             | AACACGCTACAGTAGTCTGCA                                  |
| miR-199-PR             | GTCGTATCCAGTGCAGGGT                                    |
| U6-PF                  | CTCGCTTCGGCAGCACA                                      |
| U6-PR                  | AACGCTTCACGAATTTGCGT                                   |
| miR-122 inhibitor PF   | CAAACACCATTGTCACACTCCA                                 |
| miR-122 inhibitor PR   | GAGTGTGTGACAATGGTGTGTC                                 |
| miR-122 NC PF          | TTCTCCGAACGTGTCACGTTT                                  |
| miR-122 NC PR          | ACGTGACACGTTCCGAGAATT                                  |
| Inhibitor NC PF        | CAGTACTTTTGTGTAGTACAA                                  |
| Inhibitor NC PR        | GTACTACACAAAAGTACGA                                    |

Note: PF was upstream primer. PR was downstream primer. The part highlighted with grey was enzyme site induced.
